# Supplementary material for: Metabolism of the Pacific oyster, Crassostrea gigas, is influenced by salinity and modulates survival to the Ostreid herpesvirus OsHV-1
Source: PubMed Central journal article supplement (PMC5861354; doi:10.1242/bio.028134), 2018-02-15
Supplement: biolopen-7-028134-s1.pdf [file biolopen-7-028134-s1.pdf]

Table S1: Proximate composition of oysters as a function of salinity (‰), infection (controls vs. recipients) and time (day 2 vs 4). Values are means ± SE between replicate tanks (n=3). Abbreviations: DW, Dry Weight; TAG/ST, ratio Triglyceride/Sterol

| Variables                            | Time | Controls     |             |              |              | Recipients   |              |              |              |
|--------------------------------------|------|--------------|-------------|--------------|--------------|--------------|--------------|--------------|--------------|
|                                      |      | 10           | 15          | 25           | 35           | 10           | 15           | 25           | 35           |
| Water (%)                            | 2    | 88.9 ± 0.3   | 87.8 ± 0.6  | 87.0 ± 0.1   | 87.5 ± 0.6   | 88.9 ± 0.3   | 88.5 ± 0.3   | 86.8 ± 0.4   | 85.7 ± 0.2   |
|                                      | 4    | 87.5 ± 0.2   | 86.5 ± 0.4  | 86.3 ± 0.2   | 86.1 ± 0.4   | 88.3 ± 0.3   | 88.0 ± 0.26  | 86.6 ± 0.1   | 85.6 ± 0.2   |
| Protein (mg g <sup>-1</sup> DW)      | 2    | 450.0 ± 27.4 | 470.8 ± 9.5 | 416.2 ± 5.7  | 403.0 ± 19.6 | 484.4 ± 13.2 | 480.4 ± 12.3 | 406.2 ± 13.5 | 375.5 ± 2.9  |
|                                      | 4    | 444.5 ± 28.9 | 413.2 ± 7.6 | 387.4 ± 14.5 | 380.2 ± 10.5 | 488.7 ± 10.6 | 444.6 ± 26.3 | 409.6 ± 16.3 | 370.2 ± 22.6 |
| Carbohydrate (mg g <sup>-1</sup> DW) | 2    | 191.6 ± 32.1 | 176.7 ± 7.0 | 111.7 ± 9.7  | 108.8 ± 9.1  | 164.7 ± 17.5 | 131.2 ± 4.4  | 114.0 ± 9.0  | 108.8 ± 7.9  |
|                                      | 4    | 209.3 ± 12.9 | 168.9 ± 1.5 | 113.0 ± 1.9  | 98.5 ± 0.4   | 173.3 ± 8.4  | 176.4 ± 16.2 | 132.1 ± 3.7  | 118.7 ± 11.5 |
| TAG/ST                               | 2    | 4.3 ± 0.2    | 3.9 ± 0.2   | 3.3 ± 0.3    | 2.9 ± 0.2    | 4.5 ± 0.1    | 3.5 ± 0.3    | 4.2 ± 0.2    | 4.1 ± 0.2    |
|                                      | 4    | 4.4 ± 0.1    | 3.9 ± 0.1   | 4.4 ± 0.2    | 3.6 ± 0.4    | 4.6 ± 0.5    | 3.7 ± 0.1    | 4.7 ± 0.2    | 4.1 ± 0.6    |

Table S2: Results of the split-plot ANOVA investigating the effect of salinity, infection and time and their interactions on proximate composition of oysters. Significant p-values (p < 0.05) are in **bold**.

| Source of variation                         | d.f | Water |                | Protein |                | Carbohydrate |                | TAG/ST |              |
|---------------------------------------------|-----|-------|----------------|---------|----------------|--------------|----------------|--------|--------------|
|                                             |     | F     | p              | F       | p              | F            | p              | F      | p            |
| <b>Mainplot</b>                             |     |       |                |         |                |              |                |        |              |
| Salinity                                    | 3   | 49.00 | < <b>0.001</b> | 19.01   | < <b>0.001</b> | 27.47        | < <b>0.001</b> | 4.88   | <b>0.014</b> |
| Infection                                   | 1   | 0.37  | 0.552          | 1.68    | 0.213          | 1.14         | 0.301          | 4.42   | 0.052        |
| Salinity × Infection                        | 3   | 11.15 | < <b>0.001</b> | 1.81    | 0.187          | 2.33         | 0.113          | 2.62   | 0.087        |
| Error a: Tank × Salinity × Infection        | 16  |       |                |         |                |              |                |        |              |
| <b>Subplot</b>                              |     |       |                |         |                |              |                |        |              |
| Time                                        | 1   | 18.47 | <b>0.001</b>   | 5.74    | <b>0.029</b>   | 4.09         | 0.060          | 8.33   | <b>0.011</b> |
| Salinity × Time                             | 3   | 0.43  | 0.736          | 1.63    | 0.222          | 0.60         | 0.623          | 2.04   | 0.149        |
| Infection × Time                            | 1   | 5.66  | <b>0.030</b>   | 1.73    | 0.207          | 3.91         | 0.066          | 2.16   | 0.161        |
| Salinity × Infection × Time                 | 3   | 0.26  | 0.852          | 0.09    | 0.964          | 1.55         | 0.240          | 0.74   | 0.543        |
| Error b: Tank × Salinity × Infection × Time | 16  |       |                |         |                |              |                |        |              |

Table S3: Activities of energetic and antioxidant related enzymes as a function of salinity (%), infection (controls vs. recipients) and time (day 2 vs 4). Values are means  $\pm$  SE between replicate tanks (n=3). Abbreviations: CS, Citrate Synthase; HK, Hexokinase; SOD, Superoxyde dismutase; CAT, Catalase.

| Variables                    | Time | Controls       |                |                |                | Recipients     |                |                |                |
|------------------------------|------|----------------|----------------|----------------|----------------|----------------|----------------|----------------|----------------|
|                              |      | 10             | 15             | 25             | 35             | 10             | 15             | 25             | 35             |
| HK<br>(mU mg <sup>-1</sup> ) | 2    | 1.2 $\pm$ 0.2  | 1.4 $\pm$ 0.1  | 1.9 $\pm$ 0.1  | 2.1 $\pm$ 0.2  | 1.5 $\pm$ 0.1  | 1.3 $\pm$ 0.1  | 2.0 $\pm$ 0.1  | 2.5 $\pm$ 0.1  |
|                              | 4    | 1.5 $\pm$ 0.2  | 1.8 $\pm$ 0.1  | 2.1 $\pm$ 0.1  | 1.8 $\pm$ 0.1  | 1.7 $\pm$ 0.2  | 1.7 $\pm$ 0.1  | 1.9 $\pm$ 0.1  | 2.3 $\pm$ 0.1  |
| CS<br>(mU mg <sup>-1</sup> ) | 2    | 23.8 $\pm$ 1.6 | 28.2 $\pm$ 0.7 | 25.0 $\pm$ 1.1 | 24.6 $\pm$ 1.5 | 25.8 $\pm$ 1.3 | 22.0 $\pm$ 1.7 | 26.8 $\pm$ 4.4 | 24.0 $\pm$ 0.2 |
|                              | 4    | 28.5 $\pm$ 3.6 | 30.5 $\pm$ 3.0 | 30.1 $\pm$ 3.0 | 22.7 $\pm$ 0.1 | 33.2 $\pm$ 0.5 | 27.7 $\pm$ 1.3 | 31.5 $\pm$ 1.3 | 28.4 $\pm$ 1.7 |
| SOD<br>(U mg <sup>-1</sup> ) | 2    | 11.8 $\pm$ 3.1 | 9.9 $\pm$ 0.4  | 11.5 $\pm$ 2.0 | 12.7 $\pm$ 1.8 | 9.8 $\pm$ 1.6  | 12.6 $\pm$ 1.9 | 12.3 $\pm$ 1.8 | 9.8 $\pm$ 1.3  |
|                              | 4    | 5.2 $\pm$ 0.7  | 5.7 $\pm$ 0.4  | 4.3 $\pm$ 0.7  | 5.5 $\pm$ 0.5  | 4.5 $\pm$ 0.4  | 6.0 $\pm$ 0.6  | 5.7 $\pm$ 0.2  | 4.5 $\pm$ 1.0  |
| CAT<br>(U mg <sup>-1</sup> ) | 2    | 32.5 $\pm$ 5.1 | 38.2 $\pm$ 2.3 | 40.8 $\pm$ 1.3 | 42.0 $\pm$ 3.9 | 22.8 $\pm$ 1.0 | 36.8 $\pm$ 1.8 | 38.6 $\pm$ 0.9 | 33.9 $\pm$ 1.0 |
|                              | 4    | 31.6 $\pm$ 2.6 | 41.0 $\pm$ 3.3 | 50.8 $\pm$ 4.0 | 44.3 $\pm$ 2.5 | 26.8 $\pm$ 1.9 | 29.9 $\pm$ 1.1 | 43.4 $\pm$ 3.3 | 40.8 $\pm$ 3.4 |

Table S4: Results of the split-plot ANOVA investigating the effect of salinity, infection and time and their interactions on enzyme activities in oysters. Significant p-values ( $p < 0.05$ ) are in **bold**. Abbreviations: CS, Citrate Synthase; HK, Hexokinase; SOD, Superoxyde dismutase; CAT, Catalase.

| Source of variation                                              | d.f | HK    |                | CS    |                | SOD    |                | CAT   |                |
|------------------------------------------------------------------|-----|-------|----------------|-------|----------------|--------|----------------|-------|----------------|
|                                                                  |     | F     | p              | F     | p              | F      | p              | F     | p              |
| Mainplot                                                         |     |       |                |       |                |        |                |       |                |
| Salinity                                                         | 3   | 46.45 | < <b>0.001</b> | 1.71  | 0.206          | 0.17   | 0.913          | 22.68 | < <b>0.001</b> |
| Infection                                                        | 1   | 11.16 | <b>0.004</b>   | 0.47  | 0.503          | 0.06   | 0.806          | 19.73 | < <b>0.001</b> |
| Salinity $\times$ Infection                                      | 3   | 6.30  | <b>0.005</b>   | 2.37  | 0.108          | 1.22   | 0.335          | 0.13  | 0.939          |
| Error a: Tank $\times$ Salinity $\times$ Infection               | 16  |       |                |       |                |        |                |       |                |
| Subplot                                                          |     |       |                |       |                |        |                |       |                |
| Time                                                             | 1   | 2.36  | 0.144          | 20.45 | < <b>0.001</b> | 106.32 | < <b>0.001</b> | 4.32  | 0.054          |
| Salinity $\times$ Time                                           | 3   | 3.36  | <b>0.045</b>   | 1.32  | 0.304          | 0.28   | 0.840          | 2.17  | 0.132          |
| Infection $\times$ Time                                          | 1   | 0.26  | 0.616          | 2.70  | 0.120          | 0.11   | 0.743          | 0.24  | 0.631          |
| Salinity $\times$ Infection $\times$ Time                        | 3   | 0.34  | 0.795          | 0.58  | 0.636          | 0.71   | 0.558          | 1.77  | 0.193          |
| Error b: Tank $\times$ Salinity $\times$ Infection $\times$ Time | 16  |       |                |       |                |        |                |       |                |

Table S5: Results of the ANOVA investigating the effect of salinity, infection and time and their interactions on the fatty acids composition of the polar lipids of oysters. Only fatty acids contributing to >1% were considered. Significant p-values (p < 0.05) are in **bold**.

| Source of variation                 |     | 14:0    |                | 16:0    |                | 16:1n-7     |                | 18DMA              |                | 18:0     |                | 18:1n-9  |                |
|-------------------------------------|-----|---------|----------------|---------|----------------|-------------|----------------|--------------------|----------------|----------|----------------|----------|----------------|
|                                     | d.f | F       | p              | F       | p              | F           | p              | F                  | p              | F        | p              | F        | p              |
| Salinity                            | 3   | 10.44   | < <b>0.001</b> | 1.23    | 0.333          | 3.14        | 0.055          | 4.98               | <b>0.013</b>   | 18.87    | < <b>0.001</b> | 22.43    | < <b>0.001</b> |
| Infection                           | 1   | 29.25   | < <b>0.001</b> | 1.57    | 0.228          | 1.90        | 0.188          | 0.69               | 0.418          | 1.76     | 0.203          | 4.22     | 0.057          |
| Salinity × Infection                | 3   | 4.20    | <b>0.023</b>   | 1.09    | 0.383          | 2.15        | 0.134          | 0.67               | 0.581          | 1.73     | 0.201          | 0.67     | 0.583          |
| Error : Tank × Salinity × Infection | 16  |         |                |         |                |             |                |                    |                |          |                |          |                |
| Source of variation                 |     | 18:1n-7 |                | 18:2n-6 |                | 18:3n-3     |                | 18:4n-3            |                | 20:1 dma |                | 20:1n-11 |                |
|                                     | d.f | F       | p              | F       | p              | F           | p              | F                  | p              | F        | p              | F        | p              |
| Salinity                            | 3   | 83.61   | < <b>0.001</b> | 10.88   | < <b>0.001</b> | 4.03        | <b>0.026</b>   | 11.95              | < <b>0.001</b> | 11.17    | < <b>0.001</b> | 13.79    | < <b>0.001</b> |
| Infection                           | 1   | 8.96    | <b>0.009</b>   | 9.84    | <b>0.006</b>   | 17.36       | <b>0.001</b>   | 36.44              | < <b>0.001</b> | 1.05     | 0.320          | 0.08     | 0.786          |
| Salinity × Infection                | 3   | 2.16    | 0.133          | 1.14    | 0.362          | 2.08        | 0.143          | 2.62               | 0.087          | 0.21     | 0.890          | 1.62     | 0.225          |
| Error : Tank × Salinity × Infection | 16  |         |                |         |                |             |                |                    |                |          |                |          |                |
| Source of variation                 |     | 20:1n-7 |                | 20:4n-6 |                | 20:5n-3     |                | 22:5n-6            |                | 22:5n-3  |                | 22:6n-3  |                |
|                                     | d.f | F       | p              | F       | p              | F           | p              | F                  | p              | F        | p              | F        | p              |
| Salinity                            | 3   | 2.77    | 0.076          | 171.48  | < <b>0.001</b> | 27.69       | < <b>0.001</b> | 79.69              | < <b>0.001</b> | 35.83    | < <b>0.001</b> | 9.42     | < <b>0.001</b> |
| Infection                           | 1   | 0.58    | 0.459          | 8.92    | <b>0.009</b>   | 0.40        | 0.537          | 3.40               | 0.084          | 0.49     | 0.494          | 0.93     | 0.350          |
| Salinity × Infection                | 3   | 0.63    | 0.607          | 0.38    | 0.769          | 0.46        | 0.713          | 1.06               | 0.395          | 0.54     | 0.659          | 1.28     | 0.315          |
| Error : Tank × Salinity × Infection | 16  |         |                |         |                |             |                |                    |                |          |                |          |                |
| Source of variation                 |     | 20NMI   |                | 22NMI   |                | Branched FA |                | Unsaturation index |                | Σn6      |                | Σn3      |                |
|                                     | d.f | F       | p              | F       | p              | F           | p              | F                  | p              | F        | p              | F        | p              |
| Salinity                            | 3   | 3.83    | <b>0.030</b>   | 11.61   | < <b>0.001</b> | 7.39        | <b>0.003</b>   | 9.34               | < <b>0.001</b> | 120.54   | < <b>0.001</b> | 7.76     | <b>0.002</b>   |
| Infection                           | 1   | 0.07    | 0.793          | 1.10    | 0.310          | 2.54        | 0.131          | 0.16               | 0.691          | 0.22     | 0.645          | 8.45     | 0.010          |
| Salinity × Infection                | 3   | 2.98    | 0.063          | 0.74    | 0.546          | 3.37        | 0.045          | 2.37               | 0.109          | 0.54     | 0.662          | 0.79     | 0.515          |
| Error : Tank × Salinity × Infection | 16  |         |                |         |                |             |                |                    |                |          |                |          |                |
| Source of variation                 |     | Σn3/n6  |                |         |                |             |                |                    |                |          |                |          |                |
|                                     | d.f | F       | p              |         |                |             |                |                    |                |          |                |          |                |
| Salinity                            | 3   | 140.29  | < <b>0.001</b> |         |                |             |                |                    |                |          |                |          |                |
| Infection                           | 1   | 4.14    | 0.059          |         |                |             |                |                    |                |          |                |          |                |
| Salinity × Infection                | 3   | 0.44    | 0.728          |         |                |             |                |                    |                |          |                |          |                |
| Error : Tank × Salinity × Infection | 16  |         |                |         |                |             |                |                    |                |          |                |          |                |

Table S6: Association between metabolic parameters (energetic reserves, key enzyme activities and fatty acid levels) and the risk of death of oysters exposed to OsHV-1 by a Cox proportional hazards model. For each covariate, the following elements are provided: its parameter estimate and its standard error (SE), the  $\chi^2$  statistic (with 1 degree of freedom for all tests), the resulting p value for the type II test and the corresponding instantaneous odds ratio. Only significant covariates are presented.

| Covariate                  | Estimate | SE    | $\chi^2$ | p value | Odds ratio |
|----------------------------|----------|-------|----------|---------|------------|
| $\Sigma n-3/\Sigma n-6$ d4 | -3.885   | 0.454 | 73.4     | <0.0001 | 0.02       |
| $\Sigma n-6$ d4            | 0.694    | 0.089 | 61.0     | <0.0001 | 2.00       |
| 22:5n-6 d4                 | 3.468    | 0.506 | 47.0     | <0.0001 | 32.08      |
| 20:2NMI d4                 | -6.901   | 1.192 | 33.5     | <0.0001 | 0.00       |
| AMPK d4                    | -0.029   | 0.005 | 32.9     | <0.0001 | 0.97       |
| Carbohydrate d2            | -0.032   | 0.006 | 31.2     | <0.0001 | 0.97       |
| 20:4n-6 d4                 | 0.635    | 0.118 | 28.9     | <0.0001 | 1.89       |
| 22:5n-3 d4                 | -6.986   | 1.362 | 26.3     | <0.0001 | 0.00       |
| CAT d4                     | 0.087    | 0.017 | 25.9     | <0.0001 | 1.09       |
| CAT d2                     | 0.141    | 0.028 | 24.6     | <0.0001 | 1.15       |
| $\Sigma n-3$ d4            | -1.335   | 0.277 | 23.3     | <0.0001 | 0.26       |
| 16:1n-7 d4                 | 3.979    | 0.892 | 19.9     | <0.0001 | 53.44      |
| Carbohydrate d4            | -0.018   | 0.005 | 16.6     | <0.0001 | 0.98       |
| 20:5n-3 d4                 | -1.490   | 0.368 | 16.4     | <0.0001 | 0.23       |
| 18:1n-9 d4                 | -4.400   | 1.091 | 16.3     | <0.0001 | 0.01       |
| Proteins d2                | -0.014   | 0.004 | 15.4     | <0.0001 | 0.99       |
| 22:2NMI d4                 | -1.660   | 0.466 | 12.7     | 0.0004  | 0.19       |
| Water content d4           | -0.555   | 0.158 | 12.4     | 0.0004  | 0.57       |
| 18:1n-7 d4                 | 0.849    | 0.246 | 11.9     | 0.0006  | 2.34       |
| Proteins d4                | -0.011   | 0.003 | 11.7     | 0.0006  | 0.99       |
| HK d2                      | 1.060    | 0.324 | 10.7     | 0.0011  | 2.89       |
| Water content d2           | -0.444   | 0.139 | 10.3     | 0.0014  | 0.64       |
| Branched FA d4             | -16.196  | 5.091 | 10.1     | 0.0015  | 0.00       |
| 18:0 d4                    | 1.642    | 0.543 | 9.2      | 0.0025  | 5.17       |
| Unsaturation index d4      | 0.204    | 0.068 | 9.1      | 0.0025  | 1.23       |
| 14:0 d4                    | -1.942   | 0.660 | 8.7      | 0.0032  | 0.14       |
| 18:2n-6 d4                 | -2.230   | 0.770 | 8.4      | 0.0038  | 0.11       |
| 20:1DMA d4                 | -1.233   | 0.448 | 7.6      | 0.0059  | 0.29       |
| 22:6n-3 d4                 | 1.137    | 0.476 | 5.7      | 0.0169  | 3.12       |
| HK d4                      | 1.265    | 0.537 | 5.5      | 0.0186  | 3.54       |
| 18:0DMA d4                 | -0.546   | 0.233 | 5.5      | 0.0190  | 0.58       |
| 16:0 d4                    | -2.258   | 0.985 | 5.3      | 0.0219  | 0.11       |
| 20:1n-7 d4                 | 1.822    | 0.847 | 4.6      | 0.0314  | 6.19       |
| 20:1n-11 d4                | -2.551   | 1.278 | 4.0      | 0.0459  | 0.08       |

The tested covariates were water content, protein, carbohydrate, TAG/ST, CS, CAT, SOD, HK and PK measured at day 2 and 4. Also, the main fatty acids, namely 14:0, 16:0, 16:1n-7, 18:0DMA, 18:0, 18:1n-9, 18:1n-7, 18:2n-6, 18:3n-3, 18:4n-3, 20:1DMA, 20:1n-11, 20:1n-7, 20:4n-6, 20:5n-3, 22:5n-6, 22:5n-3, 22:6n-3, 20:2NMI, 22:2NMI, branched FA, unsaturation index,  $\Sigma n-6$ ,  $\Sigma n-3$ , and the ratio  $\Sigma n-3/\Sigma n-6$  at day 4 were included. Abbreviations: d, day.
